# Supplementary material
Source: PubMed Central journal article supplement (PMC8281965)

# Supplemental Figure 1

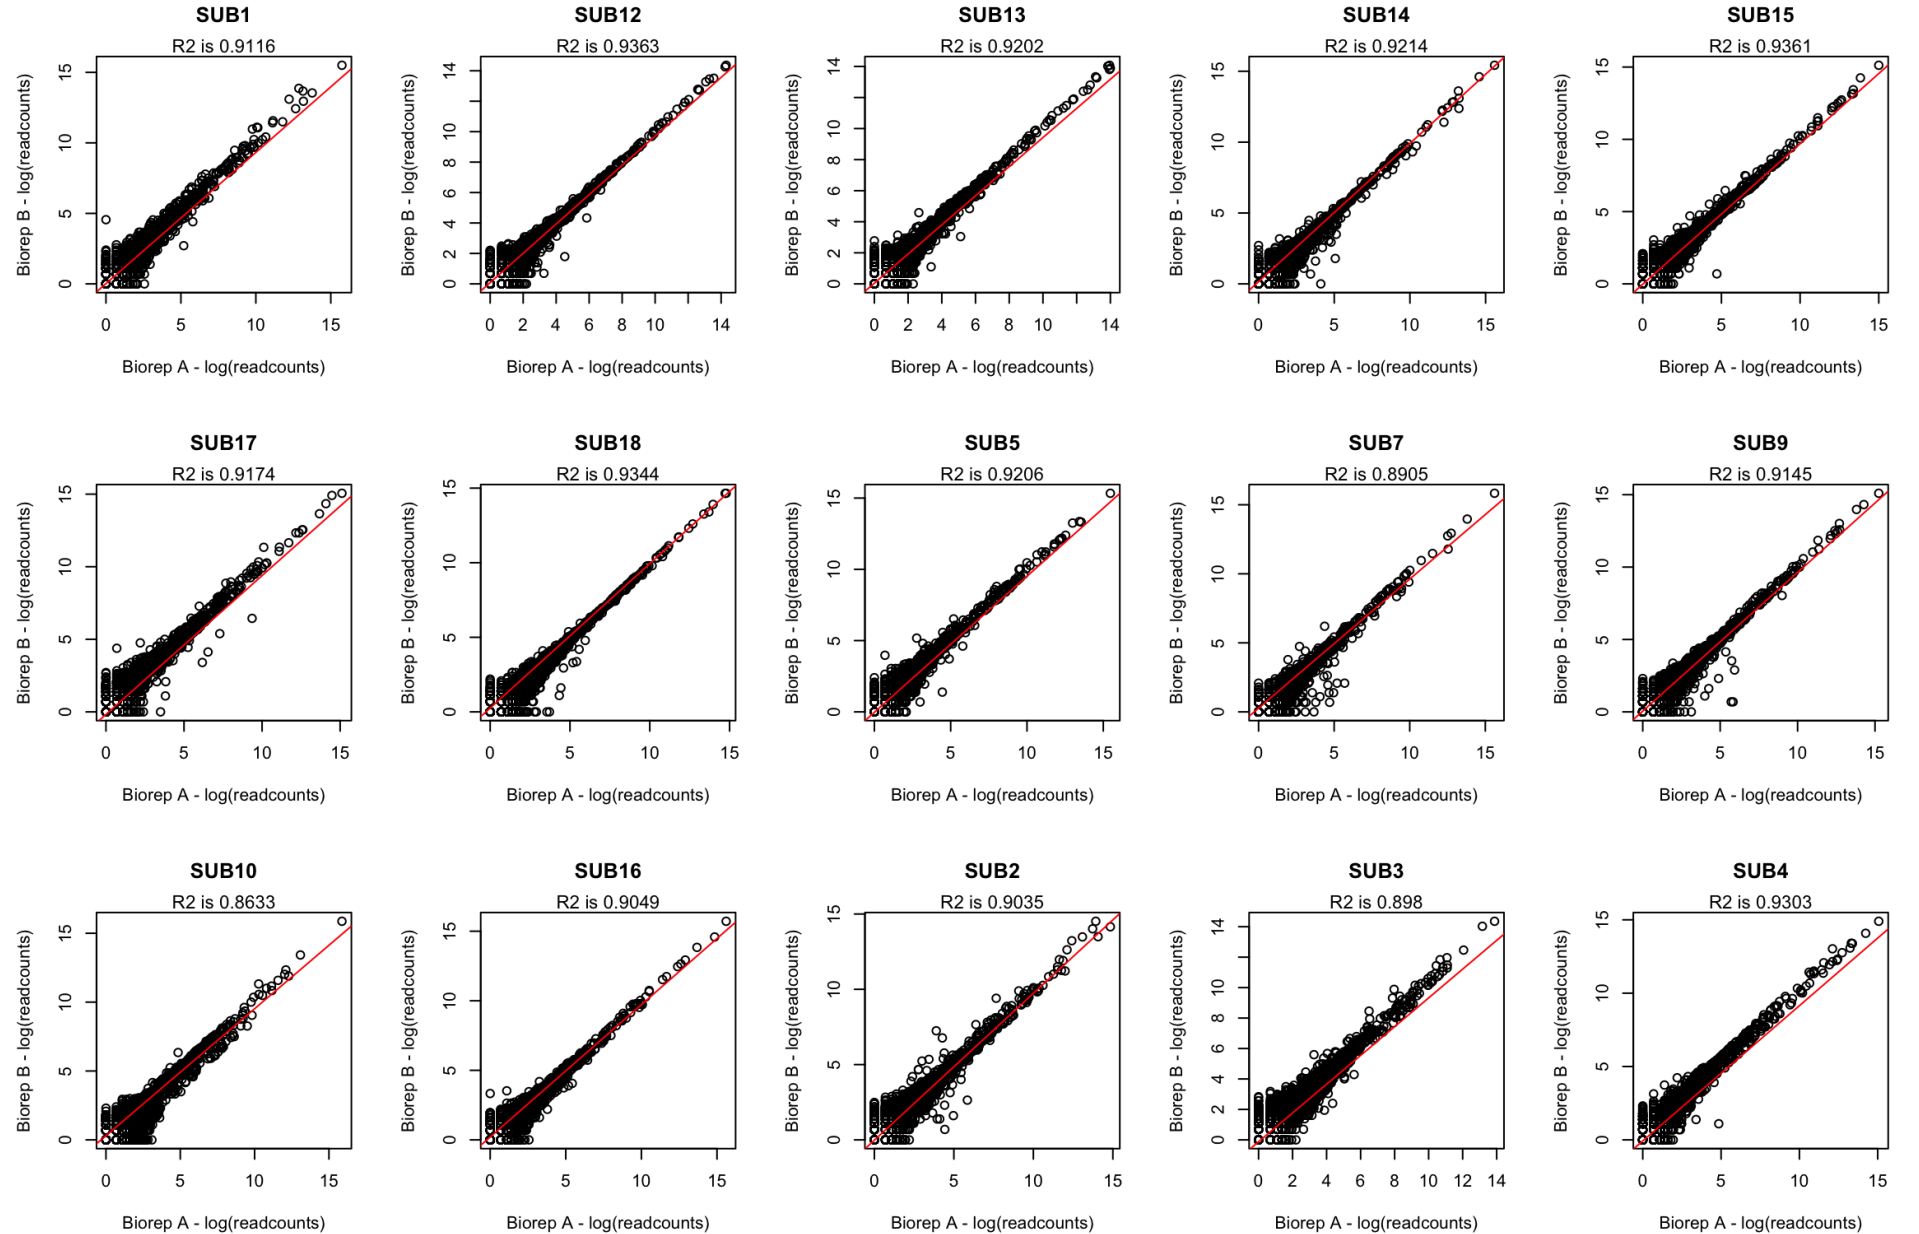

# Supplementary Figure 2

PCoA plot: Bray-Curtis Distance - Species Abundance

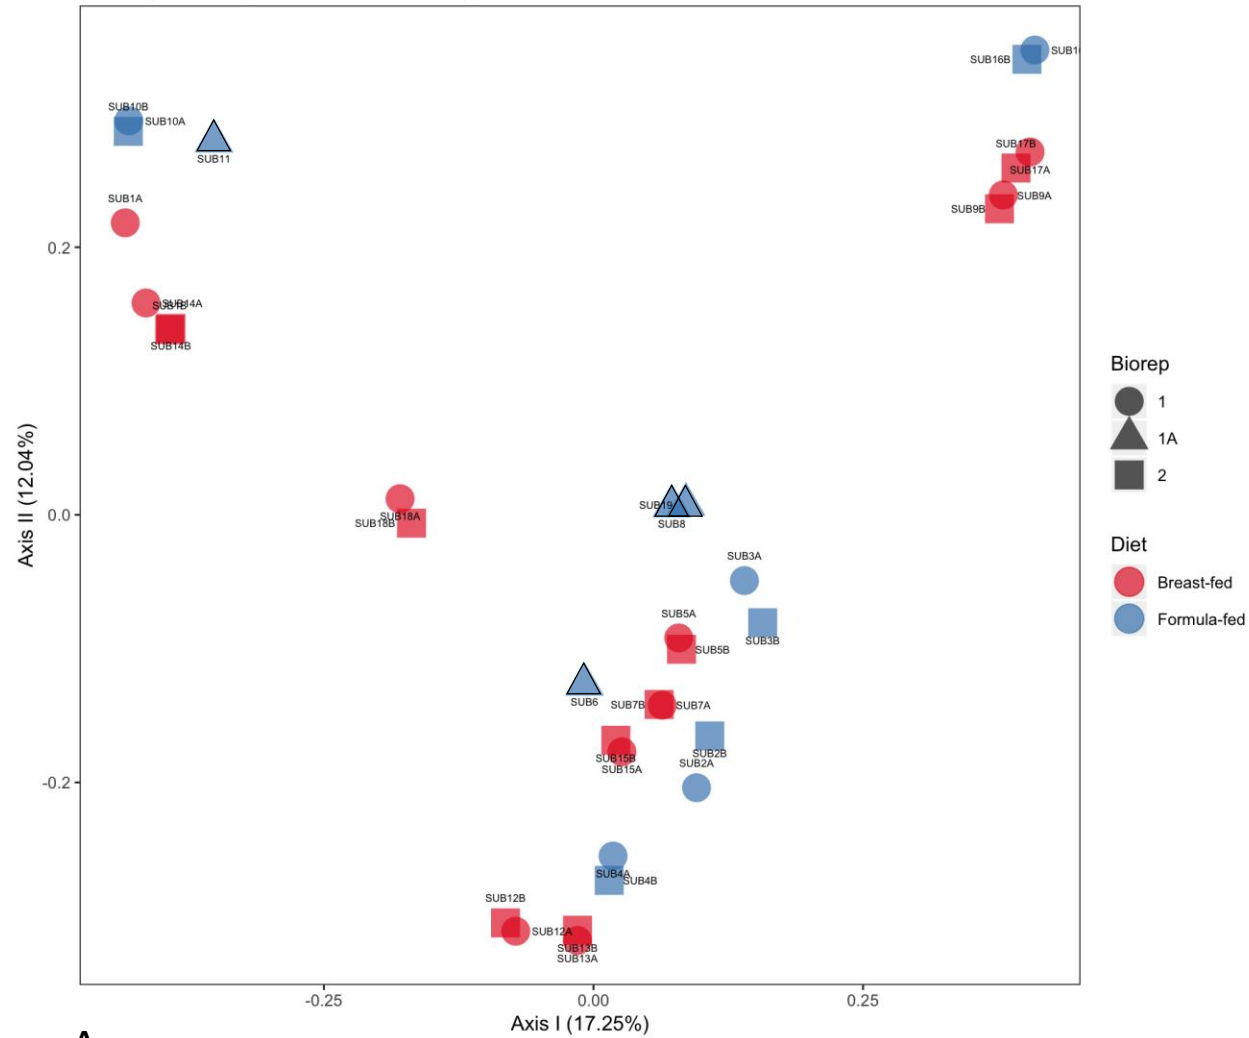

A

PCoA plot: Jaccard Distance - Species Binary

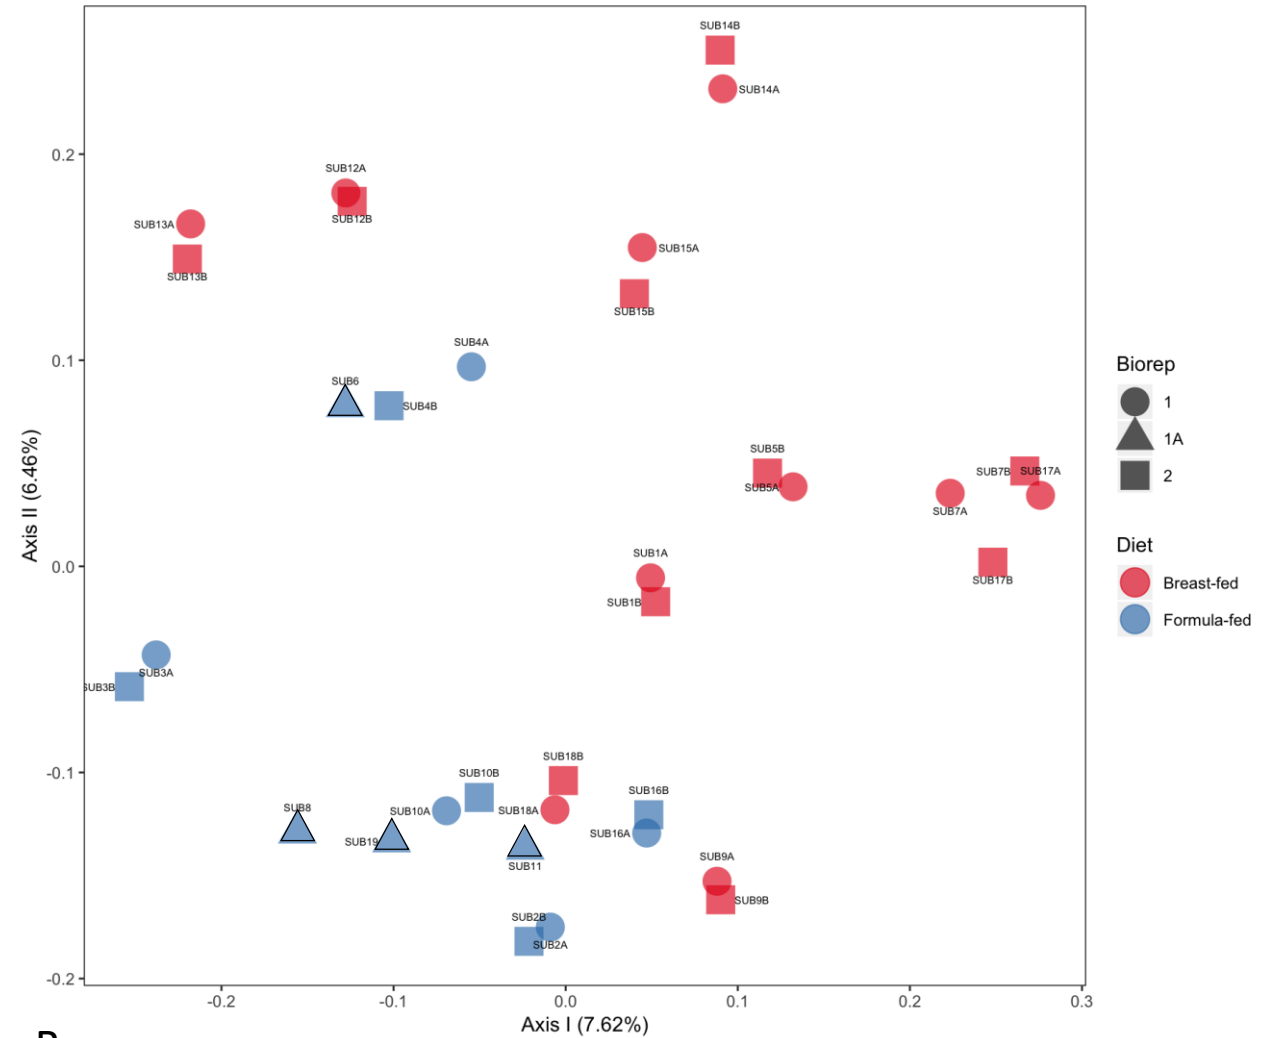

B

# Supplementary Figure 3

## Genera Abundance By Cohort

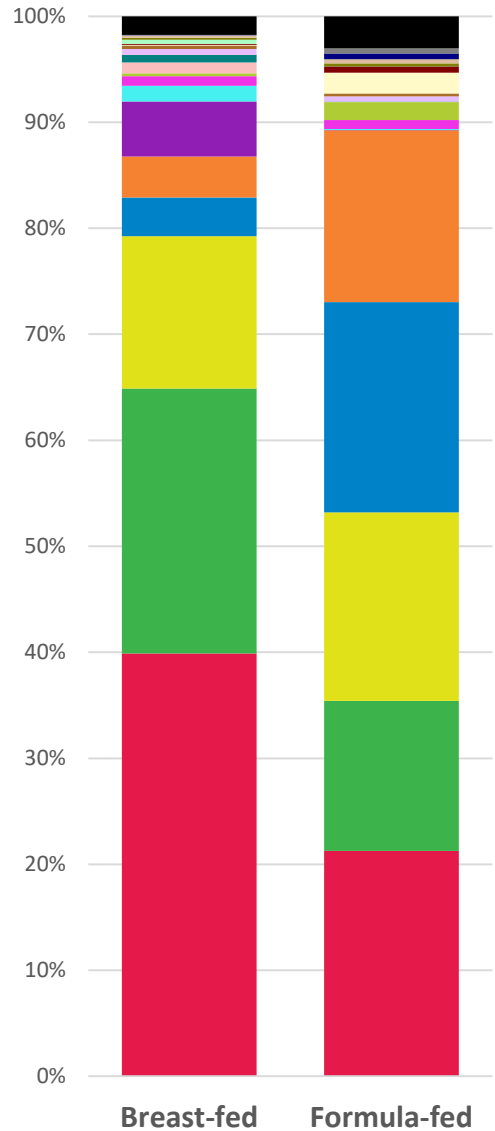

## Genera Abundance By Sample

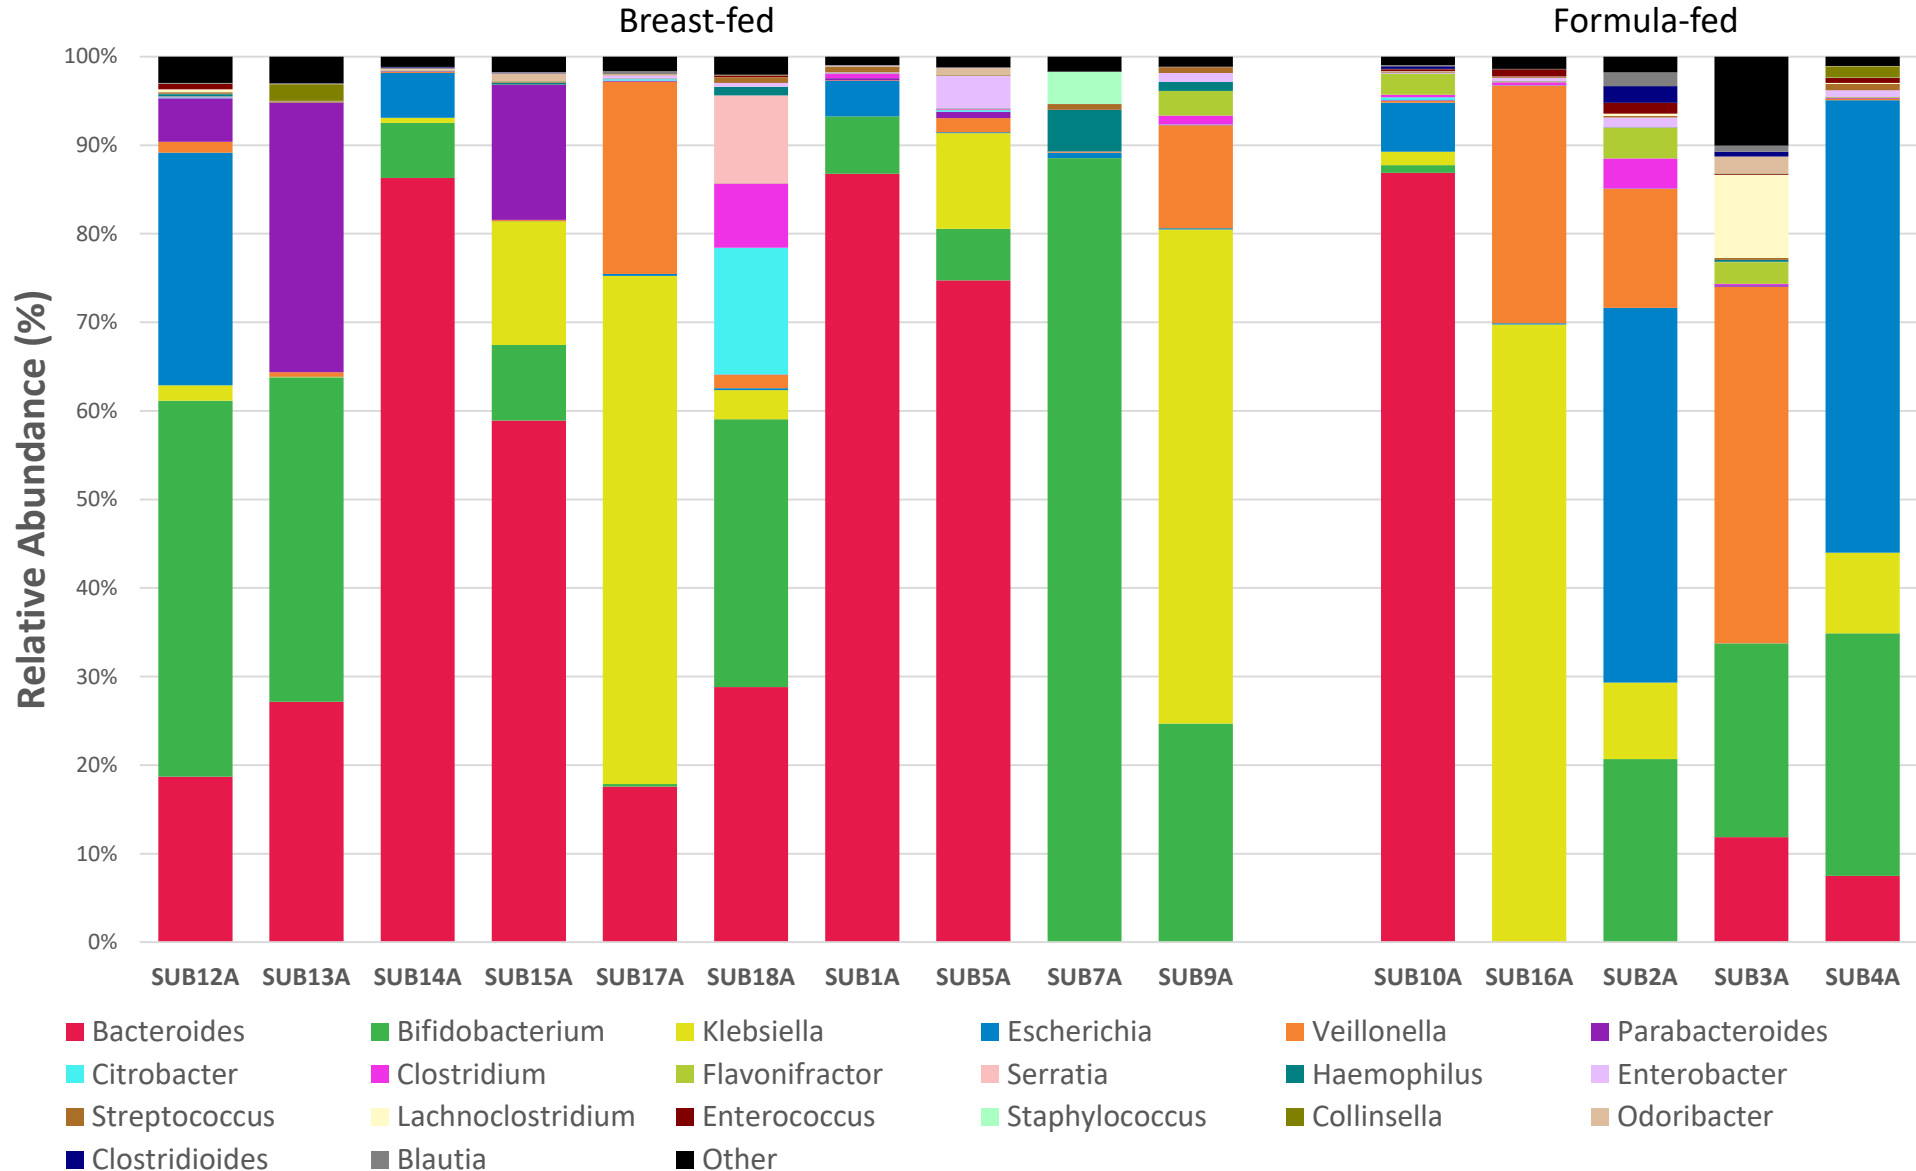

Supplement: NIHMS1606399-supplement-1.pdf [file NIHMS1606399-supplement-1.pdf]
