# Supplementary material
Source: PubMed Central journal article supplement (PMC8281965)
Supplement: NIHMS1606399-supplement-Supp__Table_1.pdf [file NIHMS1606399-supplement-Supp__Table_1.pdf]

| Sample     | Group       | Raw Reads <sup>a</sup> | Cleaned Reads <sup>b</sup> | Decontam Reads <sup>c</sup> | Classified Reads <sup>d</sup> | Avg Read Len <sup>e</sup> | Uniquely Mapped Reads <sup>f</sup> | Uniquely Mapped Reads (%) <sup>g</sup> | Avg Mapped Len <sup>h</sup> | Multi Mapped Reads <sup>i</sup> | Too Many Mapped Reads <sup>j</sup> |
|------------|-------------|------------------------|----------------------------|-----------------------------|-------------------------------|---------------------------|------------------------------------|----------------------------------------|-----------------------------|---------------------------------|------------------------------------|
| SUBJECT12A | Breast-fed  | 12657133               | 12351034                   | 12339489                    | 7270725                       | 203                       | 9219198                            | 74.71%                                 | 201.85                      | 118862                          | 120                                |
| SUBJECT12B | Breast-fed  | 12936604               | 12630335                   | 12622859                    | 7777684                       | 208                       | 9408386                            | 74.53%                                 | 206.72                      | 109466                          | 93                                 |
| SUBJECT13A | Breast-fed  | 11975209               | 11679060                   | 11664826                    | 7382648                       | 204                       | 9034835                            | 77.45%                                 | 202.97                      | 101319                          | 64                                 |
| SUBJECT13B | Breast-fed  | 13066054               | 12768140                   | 12758643                    | 7692273                       | 208                       | 10075514                           | 78.97%                                 | 207.03                      | 102455                          | 60                                 |
| SUBJECT14A | Breast-fed  | 15053426               | 14745011                   | 14735687                    | 11918114                      | 211                       | 11174734                           | 75.83%                                 | 209.87                      | 94207                           | 190                                |
| SUBJECT14B | Breast-fed  | 13822355               | 13532828                   | 13522147                    | 10763117                      | 211                       | 10407265                           | 76.96%                                 | 209.97                      | 88903                           | 173                                |
| SUBJECT15A | Breast-fed  | 11789722               | 11501043                   | 11437870                    | 8234878                       | 199                       | 9463599                            | 82.74%                                 | 198.28                      | 92730                           | 160                                |
| SUBJECT15B | Breast-fed  | 12979568               | 12665711                   | 12625070                    | 9225786                       | 203                       | 10513543                           | 83.28%                                 | 202.17                      | 95107                           | 164                                |
| SUBJECT17A | Breast-fed  | 11380343               | 11114475                   | 11025775                    | 9547213                       | 208                       | 6820861                            | 61.86%                                 | 205.03                      | 141756                          | 242                                |
| SUBJECT17B | Breast-fed  | 14655796               | 14279589                   | 13098785                    | 10927614                      | 210                       | 7963423                            | 60.80%                                 | 207.25                      | 149252                          | 267                                |
| SUBJECT18A | Breast-fed  | 13705186               | 13331276                   | 12821732                    | 9801896                       | 207                       | 10162009                           | 79.26%                                 | 207                         | 65543                           | 156                                |
| SUBJECT18B | Breast-fed  | 11990896               | 11666233                   | 11341767                    | 8698848                       | 210                       | 8992209                            | 79.28%                                 | 209.74                      | 55137                           | 121                                |
| SUBJECT1A  | Breast-fed  | 13365572               | 13018552                   | 12998305                    | 10551311                      | 196                       | 9755913                            | 75.06%                                 | 194.54                      | 91337                           | 300                                |
| SUBJECT1B  | Breast-fed  | 12781762               | 12467526                   | 12456890                    | 10225857                      | 203                       | 8820735                            | 70.81%                                 | 200.81                      | 81438                           | 287                                |
| SUBJECT5A  | Breast-fed  | 13281471               | 12983934                   | 12963442                    | 9141529                       | 203                       | 9673165                            | 74.62%                                 | 202.05                      | 146408                          | 237                                |
| SUBJECT5B  | Breast-fed  | 12645142               | 12369779                   | 12360002                    | 8394481                       | 210                       | 9181845                            | 74.29%                                 | 208.53                      | 117330                          | 145                                |
| SUBJECT7A  | Breast-fed  | 11398789               | 10973328                   | 8896563                     | 8339483                       | 206                       | 5549725                            | 62.38%                                 | 203.21                      | 79032                           | 8                                  |
| SUBJECT7B  | Breast-fed  | 11720701               | 11366003                   | 10614338                    | 10016505                      | 213                       | 6582560                            | 62.02%                                 | 210.38                      | 83728                           | 14                                 |
| SUBJECT9A  | Breast-fed  | 11204847               | 10914410                   | 10628553                    | 9301773                       | 213                       | 6455188                            | 60.73%                                 | 209.74                      | 114943                          | 127                                |
| SUBJECT9B  | Breast-fed  | 11478766               | 11148240                   | 10496969                    | 9075236                       | 213                       | 6371452                            | 60.70%                                 | 209.31                      | 108837                          | 113                                |
| SUBJECT10A | Formula-fed | 11788309               | 11538713                   | 11530193                    | 9661213                       | 207                       | 8606080                            | 74.64%                                 | 206.21                      | 50419                           | 298                                |
| SUBJECT10B | Formula-fed | 11473609               | 11230372                   | 11218399                    | 9817550                       | 212                       | 8330119                            | 74.25%                                 | 210.13                      | 44372                           | 207                                |
| SUBJECT16A | Formula-fed | 12824459               | 12502271                   | 12492961                    | 11290652                      | 205                       | 7544713                            | 60.39%                                 | 201.46                      | 165614                          | 230                                |
| SUBJECT16B | Formula-fed | 12829805               | 12523603                   | 12518269                    | 11563018                      | 210                       | 7720225                            | 61.67%                                 | 206.6                       | 157036                          | 221                                |
| SUBJECT2A  | Formula-fed | 12127916               | 11740300                   | 11723314                    | 8532270                       | 201                       | 7540092                            | 64.32%                                 | 198.45                      | 90829                           | 380                                |
| SUBJECT2B  | Formula-fed | 11651159               | 11300971                   | 11289641                    | 8286360                       | 206                       | 7449144                            | 65.98%                                 | 203.89                      | 81076                           | 166                                |
| SUBJECT3A  | Formula-fed | 11060062               | 10807117                   | 10797847                    | 2835985                       | 204                       | 8895746                            | 82.38%                                 | 202.46                      | 51802                           | 152                                |
| SUBJECT3B  | Formula-fed | 16470871               | 16051157                   | 16026213                    | 4966310                       | 199                       | 12754901                           | 79.59%                                 | 197.94                      | 83927                           | 198                                |
| SUBJECT4A  | Formula-fed | 10931262               | 10650957                   | 10639707                    | 9162589                       | 203                       | 7050997                            | 66.27%                                 | 201.08                      | 89438                           | 223                                |
| SUBJECT4B  | Formula-fed | 11852743               | 11541081                   | 11520917                    | 9021218                       | 204                       | 7895885                            | 68.54%                                 | 201.95                      | 102816                          | 195                                |

Supplementary Table 1. (a) Number of raw reads after sequencing. (b) Number of reads after adapter trimming. (c) Number of reads after human and PhiX decontamination. (d) Number of reads classified by Kraken1. (e) Average read length. (f) Number of reads which mapped to one unique location in the metagenome. (g) Percentage of reads which mapped to one unique location in the metagenome. (h) Average mapped read length. (i) Number of reads that mapped to multiple locations in the metagenome. (j) Number of reads that were discarded due to being mapped to more than 20 location in the metagenome. The means of all columns shown in this table were compared between Breast-fed and Formula-fed groups using a Welch's t-test with a significance level of 0.01; no statistically significant differences were found.

differences were found.
